# Supplementary material for: Site-specific chromosomal integration of large synthetic constructs
Source: PubMed Central journal article supplement — Nucleic Acids Res. 2010 Jan 4;38(6):e92. doi: 10.1093/nar/gkp1193 (PMC2847246; doi:10.1093/nar/gkp1193), 2010-01-04
Supplement: gkp1193_1.pdf [file gkp1193_1.pdf]

| <b>pTKRED Construction</b>  |                                                                                                                                |
|-----------------------------|--------------------------------------------------------------------------------------------------------------------------------|
| SphI-araC-Pc-PBAD-ISceI F   | CAAACCCTCACTGATCCGCATGCTTATGACAACTTGACGGCTACATC                                                                                |
| PBAD-ISceI R                | TCATTACCTGGTTTTTTTTGATGCATTTTTTATAACCTCCTTAGAGCTCGA                                                                            |
| I-SceI F                    | ATGCATCAAAAAAACCAGGTAATGA                                                                                                      |
| I-SceI-SphI R               | CTTCTGTATGGAACGGGCATGCTTATTTTCAGGAAAGTTTCGGAGGAG                                                                               |
| NheI-PlacI-lacI F           | GCACTGGCTGATCAGCTAGCATCGAATGGCGCAAACCTTTTCGC                                                                                   |
| lacI-NheI R                 | GTCCATACCCATGGGCTAGCTCACTGCCCGCTTTCAGTCGGGAAA                                                                                  |
|                             |                                                                                                                                |
| <b>pTKS/CS Construction</b> |                                                                                                                                |
| pTKS/CS PlacIQ1-Tet F       | AGACACCAGGTAGGGATAACAGGGTAATGTACCATTTACGTTGACACCACCTTTTCGCGTATGGCATGATAGCGCCCGGAAGAGAGTCAATTCAGGGTGGTGAATATGAATAGTTCGACAAAGATC |
| pTKS/CS Tet R               | ATTACCCTGTTATCCCTACTAAGCACTTGTCTCCTGTTTAC                                                                                      |
| LP2-ISceI-p15A F            | AACAGGAGACAAGTGCTTAGTAGGGATAACAGGGTAATGATGGCGCCTCATCCCTGAAGCCAAGGCATCAAATAAAACGAAAGGCTCA                                       |
| p15A-LP1-ISceI R            | GTGGTGTCAACGTAAATATTACCCTGTTATCCCTATCACCGTTTGGACCCTTGGGGCCGTAGAAAGGGCCTCGTGATACGCCTATT                                         |
|                             |                                                                                                                                |
| <b>pTKIP Construction</b>   |                                                                                                                                |
| pTKIP MCS F                 | CCGAAAAGTGCCACCTTAGGGATAACAGGGTAATTACGGCCCCAAGGTCCAAACGGTGAAGGTACCGGGCCCCCCTCGAGGTC                                            |
| neo FRT pTKIP R             | AGCATCCTGCATTACCCTGTTATCCCTATTGGCTTCAGGGATGAGGC GCCATCGAAGTTCCTATACTTTCTAGAGAATAGGAACCTCTGATCAGCGAGCTCTAGAGAATTGA              |
| I-SceI pMB1 F               | CCCTGAAGCCAATAGGGATAACAGGGTAATGCAGGATGCTGCTGGCTACCCTGTG                                                                        |
| pMB1 I-SceI R               | GGACCTTGGGGCCGTAATTACCCTGTTATCCCTAAGGTGGCACTTTTCGGGGAAATGTG                                                                    |

|                                  |                                                                                                                                                                                                     |
|----------------------------------|-----------------------------------------------------------------------------------------------------------------------------------------------------------------------------------------------------|
| pTKIP-cat F                      | TAGTATATCGGCATAGTATAATACGACAAGGTGAGGAACTAAACCAT<br>GGAGAAAAAATCACTGGATATA                                                                                                                           |
| pTKIP cat R                      | TAGAGAATAGGAACTTCTGATCAGCGAGCTCTAGAGAATTGATCCCC<br>TCACGCCCCGCCCTGCCACTCAT                                                                                                                          |
| pTKIP-hygro F                    | CGGCATAGTATATCGGCATAGTATAATACGACAAGGTGAGGAACTAA<br>ACCATGAAAAGCCTGAACTCAC                                                                                                                           |
| pTKIP-hygro R                    | TAGAGAATAGGAACTTCTGATCAGCGAGCTCTAGAGAATTGATCCCC<br>TCATCCGGGGCGTCCGTTTCCAC                                                                                                                          |
| pTKIP-gent F                     | CGGCATAGTATATCGGCATAGTATAATACGACAAGGTGAGGAACTAA<br>ACCATGTTATGGAGCAGCAACGA                                                                                                                          |
| pTKIP-gent R                     | TAGAGAATAGGAACTTCTGATCAGCGAGCTCTAGAGAATTGATCCCC<br>TCATTAGGTGGCGGTACTTGGGT                                                                                                                          |
| pTKIP-tri F                      | CGGCATAGTATATCGGCATAGTATAATACGACAAGGTGAGGAACTAA<br>ACCATGGGTCAAAGTAGCGATGA                                                                                                                          |
| pTKIP-tri R                      | TAGAGAATAGGAACTTCTGATCAGCGAGCTCTAGAGAATTGATCCCC<br>TCATTAGGCCACACGTTCAAGTG                                                                                                                          |
|                                  |                                                                                                                                                                                                     |
| <b>IvT Cassette Construction</b> |                                                                                                                                                                                                     |
| KpnI-PlacI F                     | AAACGGTGAAGGTACCATCGAATGGCGCAAACCTTTCGCG                                                                                                                                                            |
| venus-T1 R                       | TGAGCCTTTCGTTTTATTTGATGCCTCTAGAGTCTCGAGGGGGGGCC<br>CCTGCCCTTGTACAGCTCGTCCATG                                                                                                                        |
| T1 F                             | GGCATCAAATAAAACGAAAGGCTCA                                                                                                                                                                           |
| T1-Sall R                        | TATCGATACCGTTCGACTCTAGGGCGGCGGATTTGTCCTACTC                                                                                                                                                         |
|                                  |                                                                                                                                                                                                     |
| <b>O1Z Cassette Construction</b> |                                                                                                                                                                                                     |
| HindIII PLlacO1-<br>lacZ F       | ATCGATAAGCTTCCGAAAAGTGCCACCTGACGTCTAAGAAACCATTA<br>TTATCCTCGAGAATTGTGAGCGGATAACAATTGACATTGTGAGCGGA<br>TAACAAGATACTGAGCACATCAGCAGGACGCACTGACCGAATTCATT<br>AAAGAGGAGAAAGGTACCATGACCATGATTACGGATTCCTGG |
| lacZ NheI R                      | CTGCAGCCAAGCTAGCTTATTTTTGACACCAGACCAACTGGT                                                                                                                                                          |
|                                  |                                                                                                                                                                                                     |

| <b>Landing Pad Recombineering</b> |                                                                                   |
|-----------------------------------|-----------------------------------------------------------------------------------|
| atpl/gidB S/CS F                  | CAAAAAGCGGTCAAATTTATACGGTGCGCCCCCGTGATTTCAAACAAT<br>AAGTACGGCCCCAAGGTCCAAACGGTGA  |
| atpl/gidB S/CS R                  | ATAACGTGGCTTTTTTTGGTAAGCAGAAAAATAAGTCATTAGTGAAAA<br>TATTTGGCTTCAGGGATGAGGCGCCATC  |
| essQ/cspB S/CS F                  | CCCAAACCTGCACCCAAGAGTCAGAACACAGTTTTTTCAAGAGTACAAA<br>AAGTACGGCCCCAAGGTCCAAACGGTGA |
| essQ/cspB S/CS R                  | GCTAACCATTGTGGTGAAGTGCAGGTTTGCTGCATGAATAGTTTTTAC<br>AGCTTGGCTTCAGGGATGAGGCGCCATC  |
| nth/tppB S/CS F                   | CTGCTTTCCGCTCAGGCGACCGATGTCAGTGTTAATAAGGCGACGGC<br>GAATACGGCCCCAAGGTCCAAACGGTGA   |
| nth/tppB S/CS R                   | CGGAAAATGTGCGTGTGACAGCAATAGTCGGCCAGCCGAATGCAGT<br>GTTTTGGCTTCAGGGATGAGGCGCCATC    |
| ybbD/ylbG S/CS F                  | ACTGAGAAAAGACATGTGCGCTATTGTGTAAAGCCATATAGCTCAGA<br>CGATACGGCCCCAAGGTCCAAACGGTGA   |
| ybbD/ylbG S/CS R                  | TTCTATGTAAACTCTCTGACTGTTTCATTTTTATTTGTTGTTTCAGGGT<br>CGGTTGGCTTCAGGGATGAGGCGCCATC |
| ygcE/ygcF S/CS F                  | TCAACAGCGTATAGAGGCGGTTATGTAAAACCACTCATTAGCCTCAA<br>AACTACGGCCCCAAGGTCCAAACGGTGA   |
| ygcE/ygcF S/CS R                  | GATACAAAAAATTAATTTAATCAAAGTGTATTTGTATGATTCTTA<br>AATTTGGCTTCAGGGATGAGGCGCCATC     |
| yieN/trkD S/CS F                  | CTACGTTCATAAAGCCCCTTTTCCAACGAACTGCTCAGGCGGGAAAT<br>TCTTACGGCCCCAAGGTCCAAACGGTGA   |
| yieN/trkD S/CS R                  | CAAAGAAAAATACCCCCCTTTGAGACTATTTTAGCCACCAGCAAGA<br>AACTTGGCTTCAGGGATGAGGCGCCATC    |
| atpl/gidB ver F                   | CAGTAACTGAACGAGCAGAAG                                                             |
| atpl/gidB ver R                   | CTTCGTCAGGTGCAACATGAGC                                                            |
| nth/tppB ver F                    | ACCACCGAGCTTAATTTAGTTTCGC                                                         |
| nth/tppB ver R                    | CCTGTTCGACGTTTTTTCCCCGGCGC                                                        |
| essQ/cspB ver F                   | CGGCCATTTATACAGGAAAAGCCTA                                                         |
| essQ/cspB ver R                   | GTTACCTTCTCTATAGAGAGTGGTG                                                         |

|                                  |                                                                       |
|----------------------------------|-----------------------------------------------------------------------|
| ybbD/ylbG ver F                  | ATTGGAGCTGGATTGCCTGATGCTTG                                            |
| ybbD/ylbG ver R                  | CTCACATTAAACACGTAACATTTTAATTAATG                                      |
| ygcE/ygcF ver F                  | CGCTGATGCAGGGAACATAATAAAAAC                                           |
| ygcE/ygcF ver R                  | CCCCGCGCCAGCGGGGATAAACCA                                              |
| yieN/trkD ver F                  | ACCTGGCGGGCCAAGGAGGAACACA                                             |
| yieN/trkD ver R                  | AAAGCGCACAGTATGCACGATTAAC                                             |
|                                  |                                                                       |
| <b>Recombineering Efficiency</b> |                                                                       |
| del_lacZ F1                      | ATGACCATGATTACGGATTCACTGGCCGTCGTTTTACAACGTCGTCT<br>GCAGCCTGTTGACAATTA |
| del_lacZ R1                      | TTATTTTTGACACCAGACCAACTGGTAATGGTAGCGACCGGCGCTGG<br>ACAGTGGGAGTGGCACCT |
| del_lacZ R2                      | TTATTTTTGACACCAGACCAACTGGTAATGGTAGCGACCGGCGCTCG<br>CAATTAATGTGAGTTAGC |
| del_lacZ R3                      | TTATTTTTGACACCAGACCAACTGGTAATGGTAGCGACCGGCGCTCT<br>GAGATACCTACAGCGTGA |
| del_lacZ R4                      | TTATTTTTGACACCAGACCAACTGGTAATGGTAGCGACCGGCGCTTA<br>AAACTTCATTTTAAATTT |
| del_lacZ R5                      | TTATTTTTGACACCAGACCAACTGGTAATGGTAGCGACCGGCGCTCT<br>TACTTCTGACAACGATCG |
| del_lacZ R6                      | TTATTTTTGACACCAGACCAACTGGTAATGGTAGCGACCGGCGCTAC<br>CCCTATTTGTTTATTTTT |
| del_lacZ R7                      | TTATTTTTGACACCAGACCAACTGGTAATGGTAGCGACCGGCGCTAA<br>TGGCGAATGGGACGCGCC |
| del_lacZ R8                      | TTATTTTTGACACCAGACCAACTGGTAATGGTAGCGACCGGCGCTAG<br>GAGTAGAAGGTGGCGCGA |
